# Supplementary material for: Plant and Native Microorganisms Amplify the Positive Effects of Microbial Inoculant
Source: MDPI journal article supplement (doi:10.3390/microorganisms11030570), 2023-02-24

Table. S1. One-way ANOVA analysis (*p* values) of three factors (sterilization, plant, and microbial inoculant) on soil nutrient and enzyme activities. Note: ns indicates no significant effect, \* indicates *p* < 0.05, \*\* indicates *p* < 0.01, and \*\*\* indicates *p* < 0.001.

|                                 | Sterilization | Plant | Microbial<br>inoculant | Sterilization×<br>Plant | Sterilization×<br>Microbial<br>inoculant | Plant×<br>Microbial<br>inoculant | Sterilization×<br>Plant×<br>Microbial inoculant |
|---------------------------------|---------------|-------|------------------------|-------------------------|------------------------------------------|----------------------------------|-------------------------------------------------|
| Aboveground length              | ***           | ×     | ***                    | ×                       | ns                                       | ×                                | ×                                               |
| Underground length              | **            | ×     | **                     | ×                       | ns                                       | ×                                | ×                                               |
| Plant length                    | ***           | ×     | **                     | ×                       | ns                                       | ×                                | ×                                               |
| Aboveground dry weight          | ***           | ×     | ***                    | ×                       | *                                        | ×                                | ×                                               |
| Underground dry weight          | **            | ×     | **                     | ×                       | ns                                       | ×                                | ×                                               |
| Plant dry weight                | ***           | ×     | ***                    | ×                       | *                                        | ×                                | ×                                               |
| pH                              | ns            | ns    | ns                     | ***                     | ns                                       | ns                               | ns                                              |
| Total carbon                    | **            | **    | **                     | *                       | ns                                       | **                               | ****                                            |
| Soil organic carbon             | ***           | ***   | ns                     | ns                      | ns                                       | *                                | ns                                              |
| β-1,4-glucosidase               | ***           | **    | *                      | ns                      | ns                                       | ns                               | ns                                              |
| Invertase                       | ***           | ns    | *                      | ns                      | ns                                       | ns                               | ns                                              |
| Polyphenol oxidase              | *             | ns    | *                      | ns                      | v                                        | ns                               | ns                                              |
| Peroxidase                      | ns            | ns    | *                      | ns                      | ns                                       | ns                               | ns                                              |
| Total nitrogen                  | **            | ns    | ns                     | **                      | ns                                       | ns                               | ns                                              |
| NH <sub>4</sub> <sup>+</sup> -N | ***           | ***   | ***                    | ***                     | ***                                      | ns                               | ns                                              |
| NO <sub>3</sub> <sup>-</sup> -N | **            | ***   | ns                     | *                       | ns                                       | ns                               | ns                                              |
| β-1,4-N-acetylglucosaminidase   | ***           | ***   | ***                    | *                       | *                                        | ns                               | ns                                              |
| Urease                          | ***           | **    | ns                     | *                       | ns                                       | ns                               | ns                                              |
| Available phosphorus            | ns            | ns    | *                      | ns                      | ns                                       | ns                               | ns                                              |
| Acid phosphatase                | ns            | **    | ns                     | *                       | ns                                       | ns                               | ns                                              |
| Neutral phosphatase             | **            | ns    | ns                     | ns                      | ns                                       | ns                               | ns                                              |

|                         |     |     |     |     |     |    |    |
|-------------------------|-----|-----|-----|-----|-----|----|----|
| Alkaline phosphatase    | ns  | *** | **  | *** | ns  | ns | ns |
| Total sulfur            | ns  | ns  | ns  | **  | ns  | ns | ns |
| Arylsulphatase          | *** | **  | *** | *** | *** | ns | ns |
| Total potassium         | ns  | ns  | ns  | ns  | ns  | ns | ns |
| Available potassium     | *** | *** | *** | ns  | ns  | ns | ns |
| Soil multifunctionality | *** | *** | *** | **  | *   | *  | ns |

---

Fig.S1. Experimental design

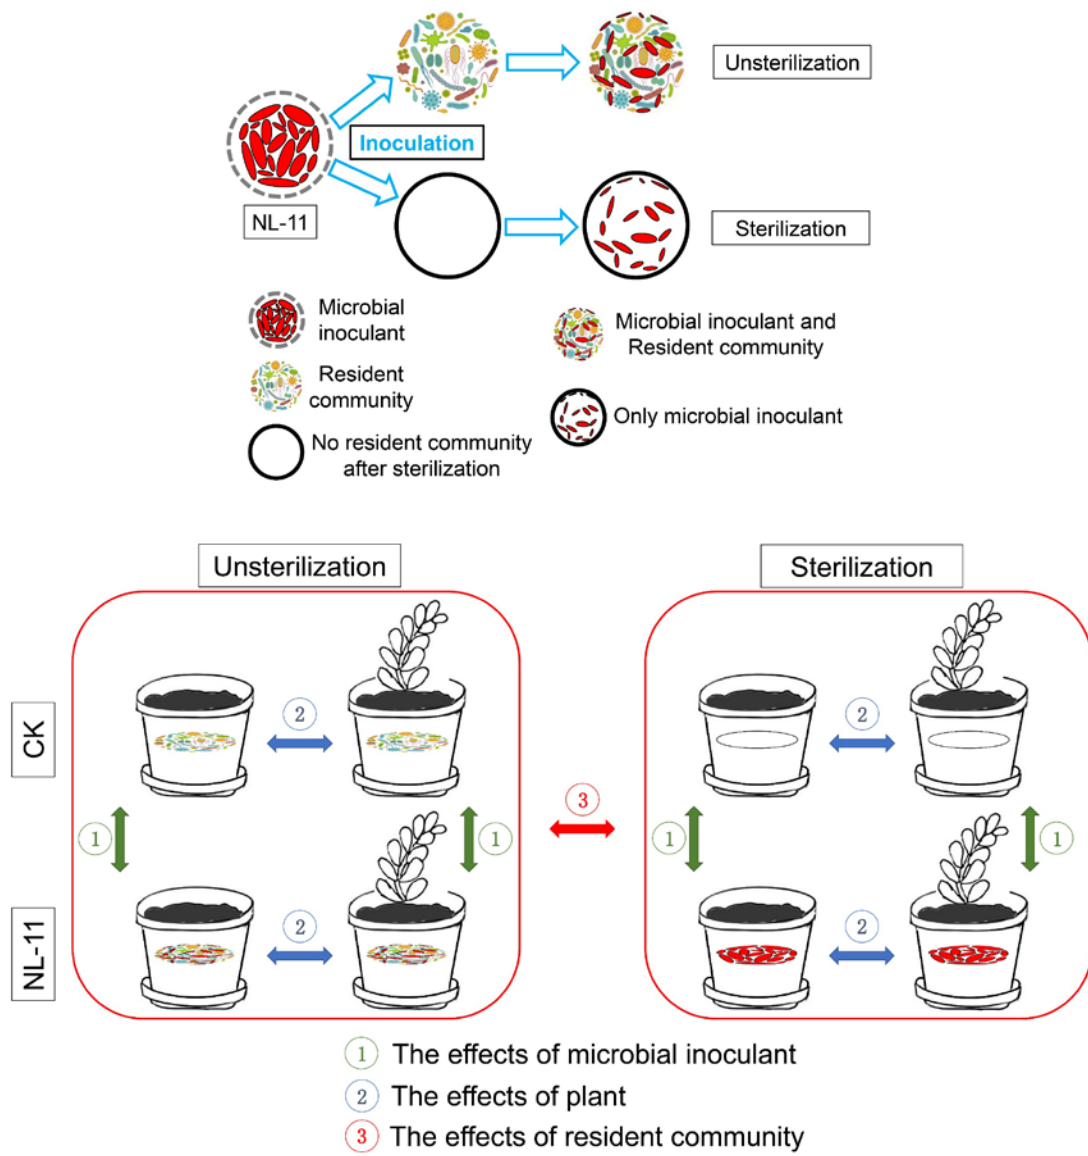

Fig. S2. Soil nutrient indexes in response to plant, sterilization, and microbial inoculant treatments. Note: ns indicates no significant effect, \* indicates  $p < 0.05$ , \*\* indicates  $p < 0.01$ , and \*\*\* indicates  $p < 0.001$ .

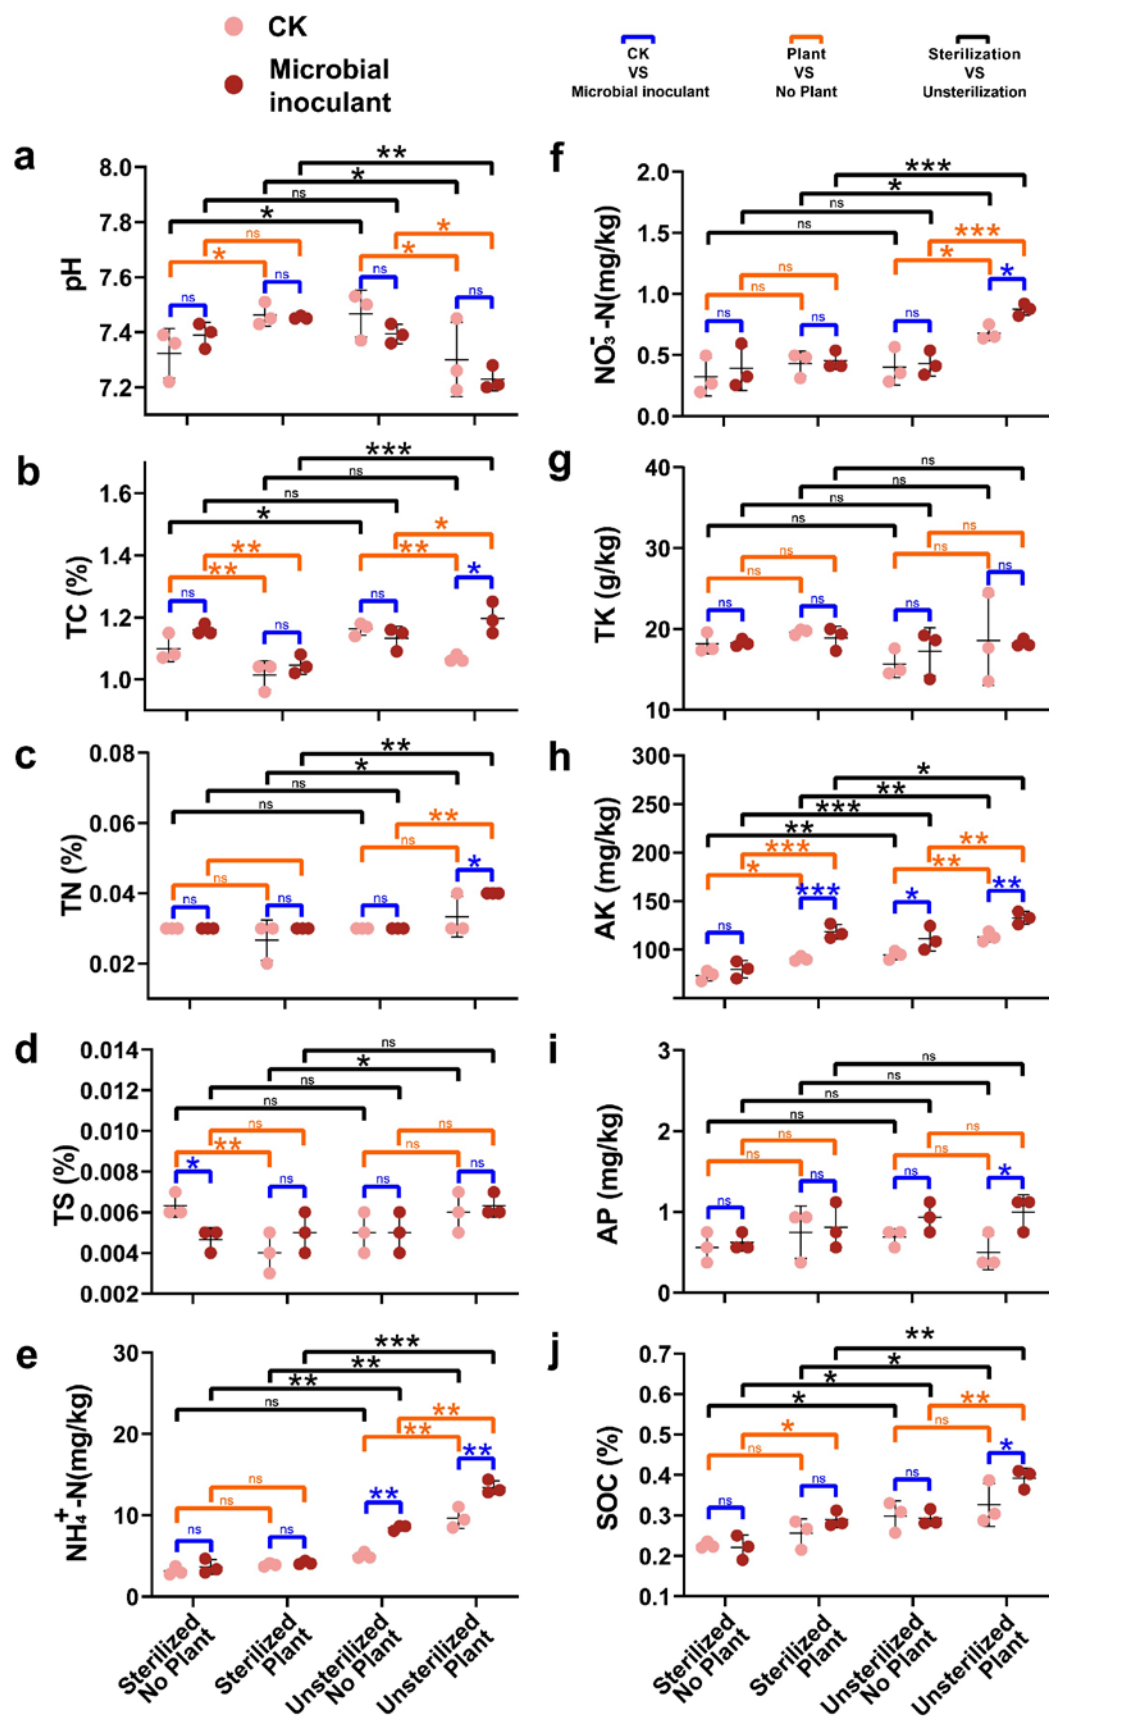

Fig. S3. Soil enzyme activity indexes in response to plant, sterilization, and microbial inoculant treatments. Note: ns indicates no significant effect, \* indicates  $p < 0.05$ , \*\* indicates  $p < 0.01$ , and \*\*\* indicates  $p < 0.001$ .

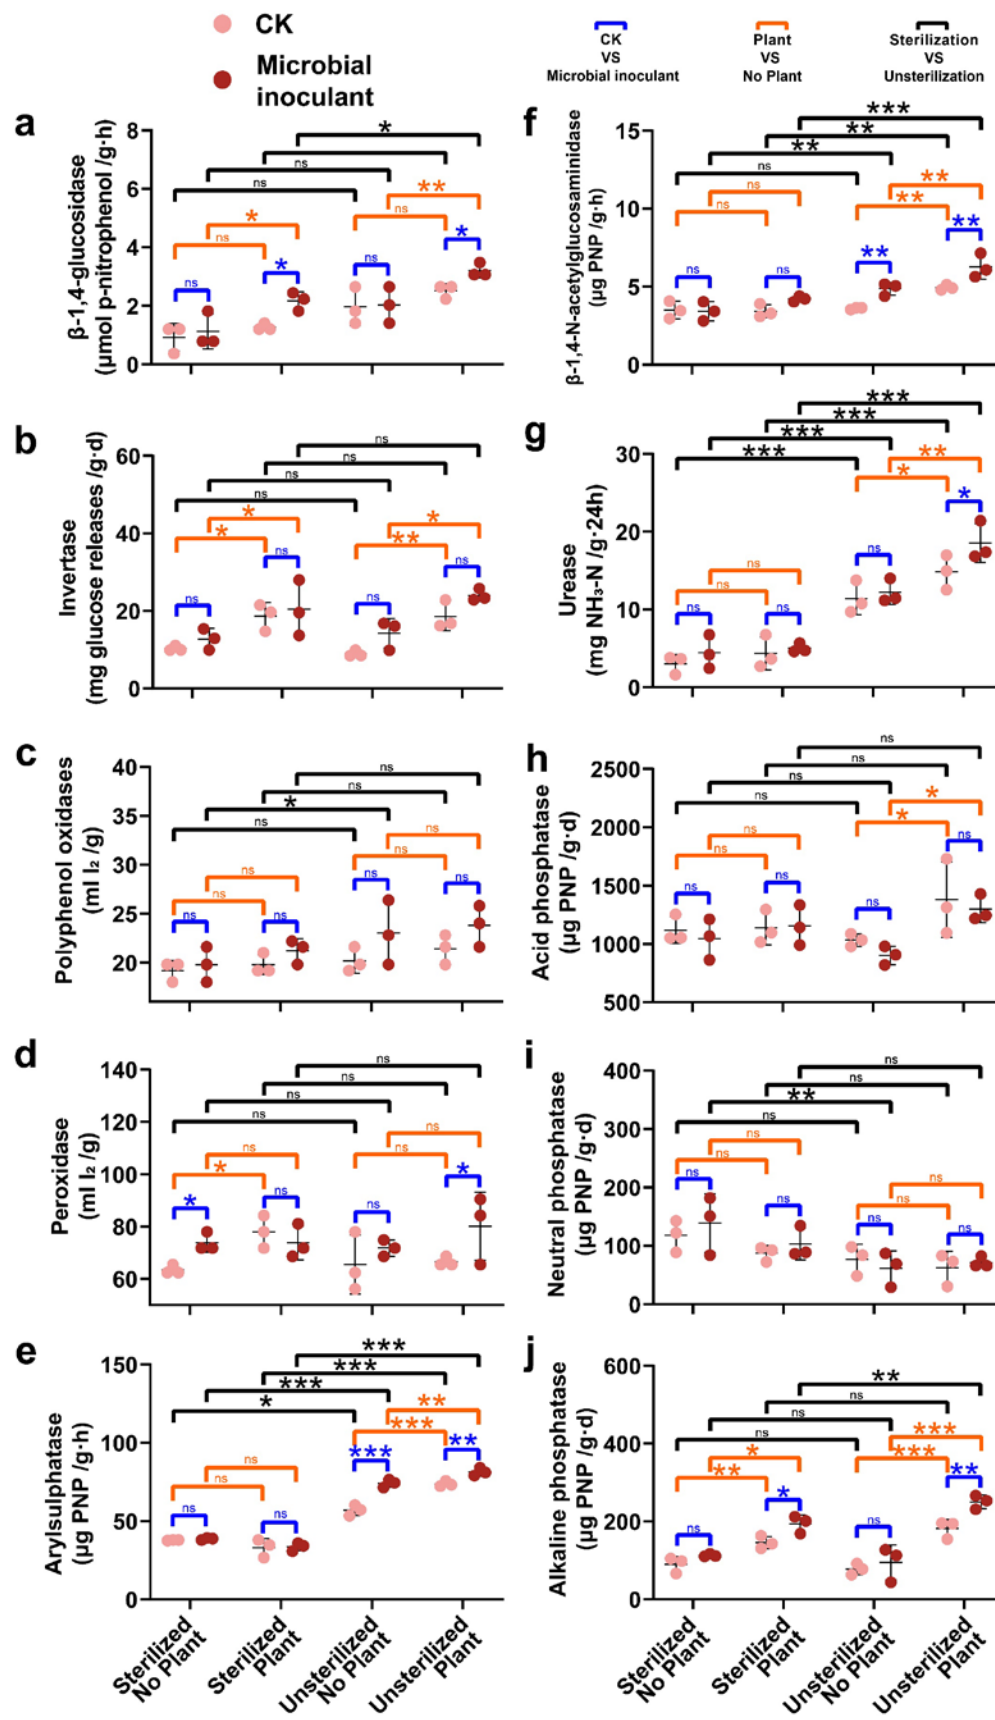

Fig. S4. Nonmetric multidimensional scaling (NMDS) analysis was based on Bray-Curtis dissimilarity.

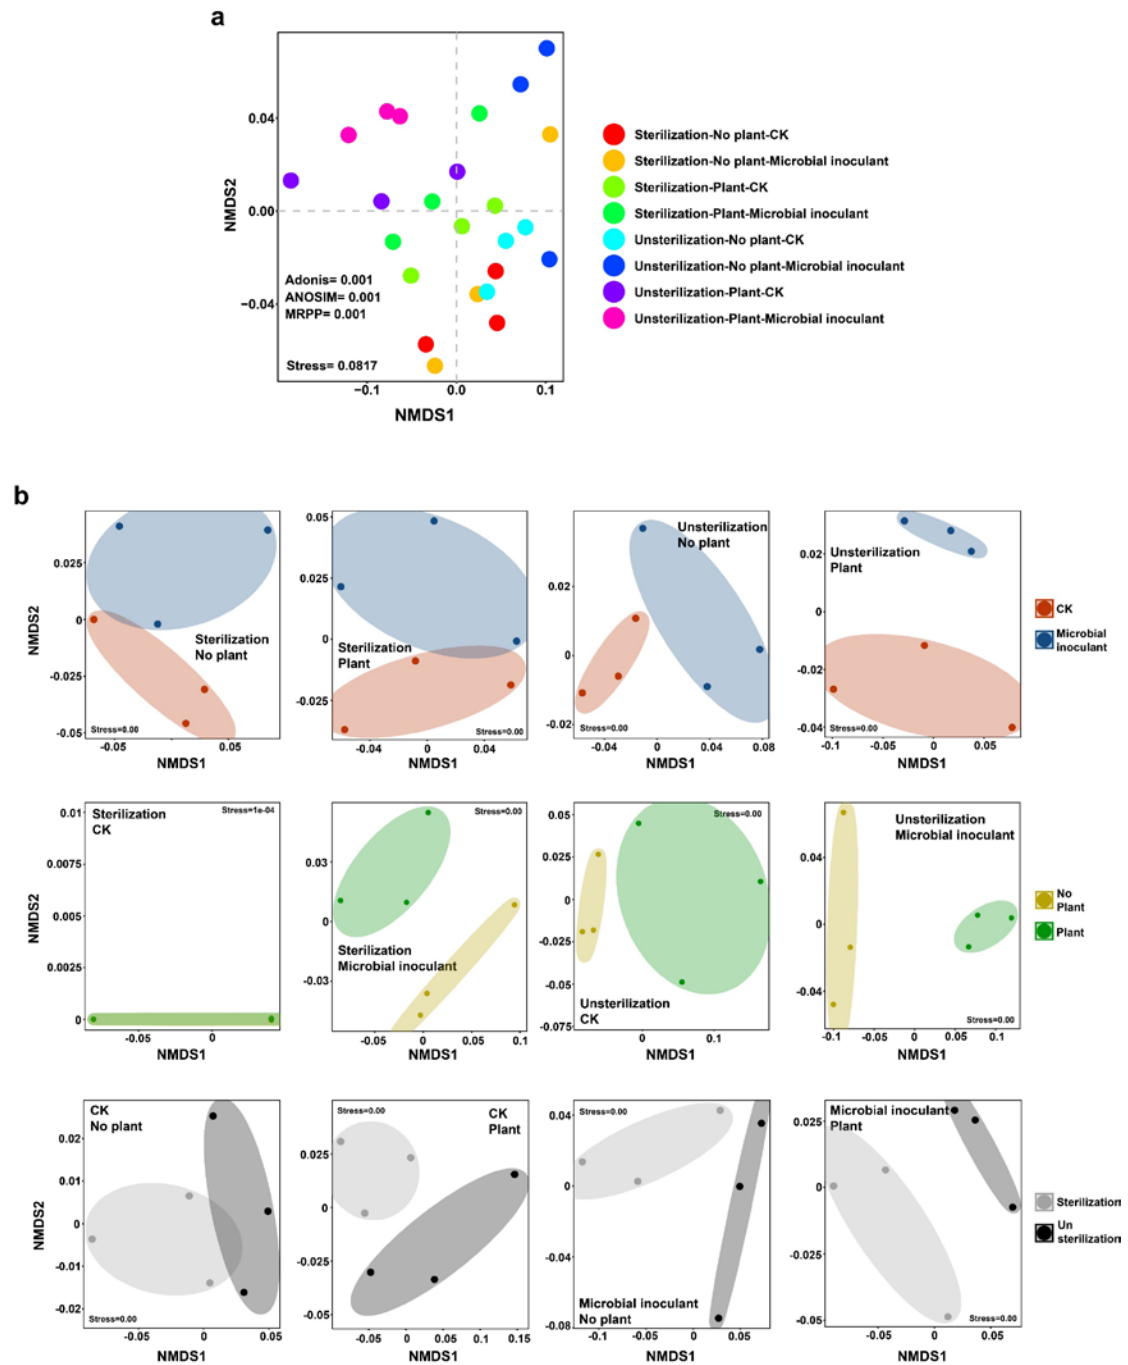

Fig. S5. The relationship among soil multifunctionality index, soil nutrient, and enzyme activity. In the square, the blue and red colors represent a positive and negative correlation, respectively, between the two variables. The association between the variables is stronger the deeper the hue.

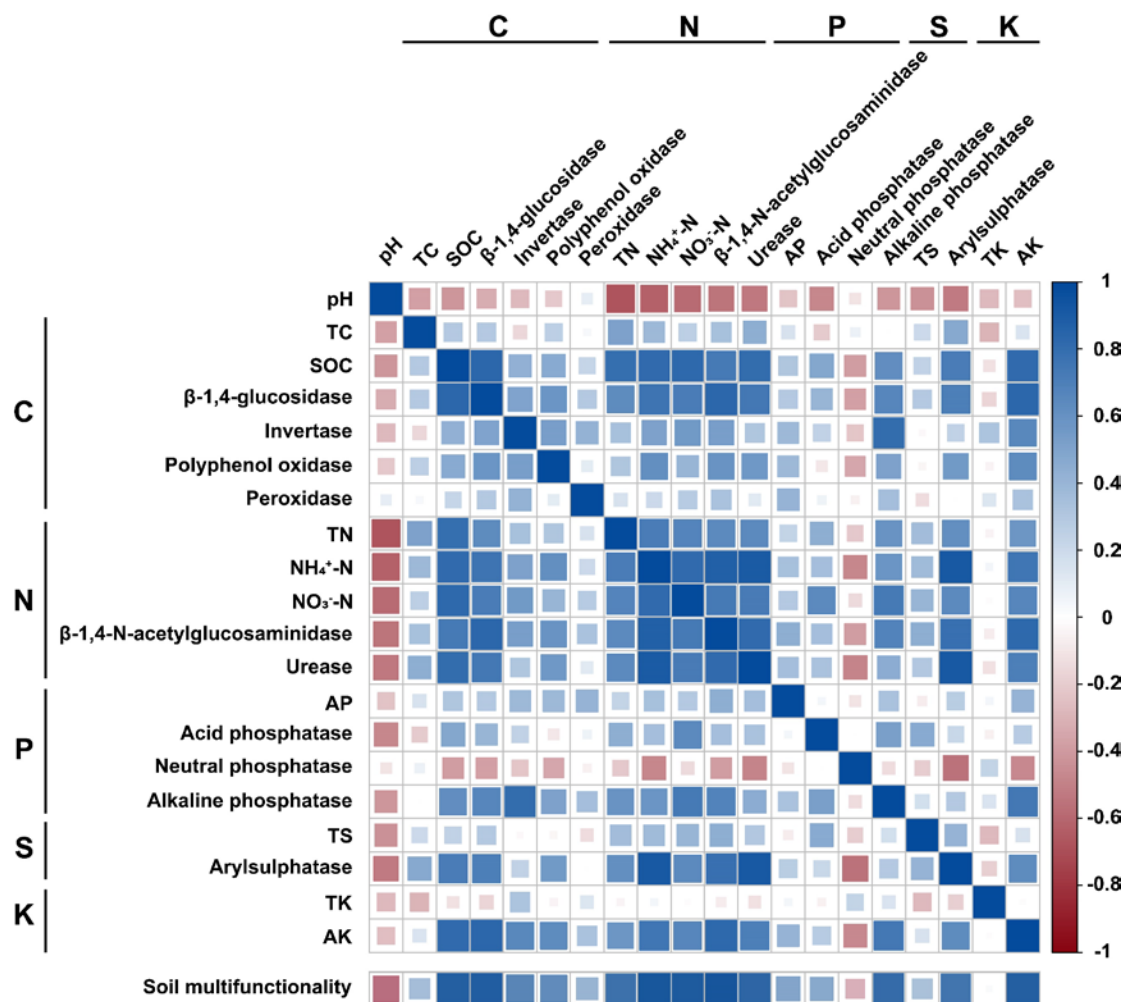

Supplement: s1 [file s1]
